# Supplementary material for: Genetic Variants Implicate Dual Oxidase-2 in Familial and Sporadic Nonmedullary Thyroid Cancer
Source: Oxford University Press journal article supplement (doi:10.1158/0008-5472.can-19-0721), 2019-09-09
Supplement: 00085472can190721-sup-218197_4_supp_5740010_pwy995.docx [file 00085472can190721-sup-218197_4_supp_5740010_pwy995.docx]

| **Supplemental Table 1.** PCR and sequencing primers | | | |
| --- | --- | --- | --- |
| **Target** | **Sequence** | **Orientation** | **Annealing Temp. (˚C)** |
| BRAFV600 | 5’ GGATCCAGACAACTGTTCAAACTGATGGGACC | Forward | 67 |
| 5’ GGATCCAGACAACTGTTCAAACTGATGGGACC | Reverse |
| HRASQ61 | 5’ GTTGATGGCAAACACACACAGGAAGCCC | Forward | 67 |
| 5’ GGATTCCTACCGGAAGCAGGTGGTCATTG | Reverse |
| KRASQ61 | 5’ CAGTCTGGAGCAAGTTACTCCACTGC | Forward | 67 |
| 5’ GCACTGTAATAATCCAGACTGTGTTTCTCC | Reverse |
| NRASQ61 | 5’ GAGGAAGCCTTCGCCTGTCCTCATG | Forward | 67 |
| 5’ CCCCCAGGATTCTTACAGAAAACAAGTGGTTATAGATGGTG | Reverse |
| DUOX2Y1203H | 5’ ATCAGAGCATAGCTGCCATGGATGATGAGCTG | Forward | 67 |
| 5’ CAGCCCAAGCTGAAGTCCTGAGACTACTCAC | Reverse |
| rs965513 | 5’ GGATGAAAGGAGGTAGCAGGCAGAGAATGTAGG | Forward | 67 |
| 5’ CCCAGGCTCAGGTTATGTCTTTGTTAGCATTGTGAG | Reverse |
