# Supplementary material for: Genetic Variants Implicate Dual Oxidase-2 in Familial and Sporadic Nonmedullary Thyroid Cancer
Source: Oxford University Press journal article supplement (doi:10.1158/0008-5472.can-19-0721), 2019-09-09
Supplement: 00085472can190721-sup-218197_4_supp_5740011_pwy995.docx [file 00085472can190721-sup-218197_4_supp_5740011_pwy995.docx]

| **Supplemental Table 2.** Hereditary cancer syndromes associated with increased non-medullary thyroid cancer risk | | | | | | | |
| --- | --- | --- | --- | --- | --- | --- | --- |
|  |  | **Patient** | | | | |  |
| **Syndrome** | **Gene** | **II.2** | **III.2** | **III.3** | **III.4** | **III.5** | **Notes** |
| Cowden syndrome (PTEN Hamartoma tumor syndrome) | PTEN | WT | WT | WT | WT | WT | - |
| Gardner syndrome (familial adenomatous polyposis syndrome) | APC | V1822D; Homo.;  PolyPhen 2 Score = 0.000 | V1822D; Homo;  PolyPhen 2 Score = 0.000 | V1822D; Homo.;  PolyPhen 2 Score = 0.000 | V1822D; Homo.;  PolyPhen 2 Score = 0.000 | V1822D; Homo.;  PolyPhen 2 Score = 0.000 | Neutral or possible protective effect |
| Autosomal recessive familial adenomatous polyposis | MUTYH | T455P; Het | T455P; Het | T455P; Het | T455P; Het | T455P; Het | Only homozygous individuals affected. |
| Carney complex | PRKAR1A | WT | WT | WT | WT | WT | - |
| Peutz-Jeghers syndrome | STK11 | WT | WT | WT | WT | WT | - |
| Werner syndrome | WRN | WT | WT | WT | WT | WT | - |
| FNMTC | HABP2 G534E | WT | WT | WT | WT | WT | - |
| FNMTC | SRRM2 S346F | WT | WT | WT | WT | WT | P804T in 4/5 affected individuals; PolyPhen-2 0.000 |
| FNMTC | FOXE1 A248G | WT | WT | WT | WT | WT | - |
| WT – wild-type; Homo – homozygous; Het - heterozygous | | | | | | | |
